# Supplementary material for: Development of Highly Informative Genome-Wide Single Sequence Repeat Markers for Breeding Applications in Sesame and Construction of a Web Resource: SisatBase
Source: Front Plant Sci. 2017 Aug 22;8:1470. doi: 10.3389/fpls.2017.01470 (PMC5572293; doi:10.3389/fpls.2017.01470)
Supplement: Supplementary file 1 [file Data_Sheet_1.XLSX]

## Sheet: Feuil1
Development of a genome-wide reference microsatellite kit for breeding applications in sesame (Sesamum indicum L.) and construction of a web resource: SisatBase
Komivi Dossa1,2+, Jingyin Yu1+, Boshou Liao1, Daniel Fonceka2, Ndiaga Cisse2* and Xiurong Zhang1*
*Corresponding authors: Xiurong Zhang, Email: zhangxr@oilcrops.cn, Tel.: +86-27-86811836, Fax: +86-27-868118356/ Ndiaga Cisse, Email: cissendiaga02@hotmail.com, Tel.: +221-33-9514993, Fax: +221-33-9514995.
Supplementary Table S1. Origin of sesame accessions used in this study
	Accession code	Country of origin	Geographical Area	Seed coat color
	CM01	Togo	West Africa	White
	CM02	Mali	West Africa	White
	CM03	Mali	West Africa	White
	CM04	Togo	West Africa	White
	CM05	Mali	West Africa	White
	CM06	Senegal	West Africa	White
	CM07	Togo	West Africa	Brown
	CM08	Mali	West Africa	White
	CM09	Benin	West Africa	White
	CM10	Burkina Faso	West Africa	White
	CM11	Senegal	West Africa	Brown
	CM12	Ivory coast	West Africa	White
	CM13	Togo	West Africa	White
	CM14	Benin	West Africa	White
	CM15	Togo	West Africa	Black
	CM16	Senegal	West Africa	Grey
	CM17	Benin	West Africa	Black
	CM18	Cameroon	Central Africa	Grey
	CM19	Cameroon	Central Africa	White
	CM20	Ethiopia	East Africa	Yellow
	CM21	Ethiopia	East Africa	White
	CM22	Guinea	West Africa	Brown
	CM23	Nigeria	West Africa	White
	CM24	Cameroon	Central Africa	White
	CM25	Nigeria	West Africa	Yellow
	CM26	Senegal	West Africa	Yellow
	CM27	Senegal	West Africa	White
	CM28	Burkina Faso	West Africa	White
	CM29	Burkina Faso	West Africa	Yellow
	CM30	Nigeria	West Africa	White
	CM31	Niger	West Africa	White
	CM32	Niger	West Africa	Yellow
	CM33	Benin	West Africa	White
	CM34	Cameroon	Central Africa	White
	CM35	Senegal	West Africa	White
	CM36	Burkina Faso	West Africa	White
	CM37	Mali	West Africa	White
	CM38	Mali	West Africa	White
	CM39	Senegal	West Africa	Grey
	CM40	Mali	West Africa	White
	CM41	Togo	West Africa	Black
	CM42	Ghana	West Africa	White
	CM43	Mali	West Africa	White
	CM44	Cameroon	Central Africa	Black
	CM45	Niger	West Africa	White
	CM46	Nigeria	West Africa	White
	CM47	Burkina Faso	West Africa	White
	CM48	Benin	West Africa	Brown

## Sheet: Feuil2
Samples ID	Longitude(°)	Latitude(°)	Structure Group	Structure subpopulation	Probability
G468	32.35	25.58	G1	P1	0.774
G469	32.45	25.71	G1	P1	0.649
G452	32.4	25.11	G1	P1	0.677
G519	79.19	28.1	G1	P1	0.894
G527	77.32	10.27	G1	P1	0.799
G553	73.04	31.25	G1	P1	0.856
G593	-13.4	9.32	G1	P1	0.659
G626	33.15	32.03	G1	P1	0.617
G806	114.33	30.35	G1	P1	0.956
G808	121.43	29.28	G1	P1	0.637
G811	109.89	31.08	G1	P1	0.642
G812	113.81	29.26	G1	P1	0.83
G813	120.75	30.77	G1	P1	0.697
G819	115.79	29.58	G1	P1	0.924
G822	114.06	24.95	G1	P1	0.707
G825	115.86	31.69	G1	P1	0.801
G839	108.12	28.26	G1	P1	0.613
G840	106.82	28.14	G1	P1	0.678
G843	118.77	32.05	G1	P1	0.933
G845	109.84	19.05	Gmixed	P1	0.653
G854	107.72	31.36	G1	P1	0.607
G858	104.44	31.83	G1	P1	0.712
G867	125.48	35.38	G1	P1	0.728
G874	105.51	21.02	G1	P1	0.666
k1701	-16.13	14.53	G2	P2	0.647
k1702	-16.08	14.48	G2	P2	0.722
k1705	33.44	37.61	G2	P2	0.604
k1708	-16.03	14.38	G2	P2	0.743
k1710	-16	14.18	G2	P2	0.884
k1711	-15.9	14.34	G2	P2	0.642
k1714	-15.85	14.19	G2	P2	0.838
k1715	-15.81	14.45	G2	P2	0.832
k1717	-15.81	14.55	G2	P2	0.935
k1719	-15.81	15	G2	P2	0.612
k1720	-15.65	14.2	G2	P2	0.69
k1722	-15.56	14.5	G2	P2	0.649
k1723	-15.45	14.4	G2	P2	0.936
k1724	-16.2	14.12	G2	P2	0.956
k1725	-16.15	14.56	G2	P2	0.68
k1726	-15.3	15	G2	P2	0.675
k1727	-15	14.2	G2	P2	0.773
HNT002	5.02	7.48	G2	P2	0.607
HNT003	7.16	6.41	G2	P2	0.63
G425	32.4	15.45	G2	P3	0.911
G428	37.51	7.13	G2	P3	0.948
G436	-13.4	9.32	G1	P3	0.648
G458	136.5	35.12	G1	P3	0.726
G522	75.58	21.06	G2	P3	0.82
G524	100.31	13.45	G2	P3	0.661
G543	31.15	30.03	Gmixed	P3	0.617
G595	-13.47	9.4	G1	P3	0.738
G814	120.82	29.59	G2	P3	0.774
G818	115.89	29.61	G2	P3	0.697
G820	107.36	22.42	G1	P3	0.659
G821	107.2	22.84	G2	P3	0.887
G862	96.09	16.48	G2	P3	0.92
G868	95.39	19.08	Gmixed	P3	0.84
G871	71.34	26.11	G2	P3	0.855
G876	90.24	23.42	G2	P3	0.924
G877	72.29	25.56	G2	P3	0.846
k1697	-8.44	12.82	G2	P4	0.629
k1698	-7.45	12.7	G2	P4	0.829
k1699	-6.88	12.58	G2	P4	0.602
k1703	-12.85	13.25	G2	P4	0.686
k1704	39.85	38.46	G2	P4	0.603
k1706	-15.65	14.39	G2	P4	0.948
k1707	-15.71	14.55	G2	P4	0.626
k1709	-15.8	14.36	G2	P4	0.958
k1712	-15.7	14.12	G2	P4	0.644
k1713	-16.2	15.1	G2	P4	0.901
k1718	-14.23	14.33	G2	P4	0.841
k1721	-15.33	14.89	G2	P4	0.943
k1728	-15.3	14.52	G2	P4	0.739
k1729	-15.2	14.4	G2	P4	0.897
k1730	-15.13	14.38	G2	P4	0.677
k1731	-15.03	14.28	G2	P4	0.78
k1777	-4.59	11.11	G2	P4	0.63
HNT001	8.23	8.33	G2	P4	0.61
G801	116.58	35.41	G1	P5	0.925
G802	118.35	35.19	G1	P5	0.837
G804	113.82	34.03	G1	P5	0.659
G807	123.2	45.84	G1	P5	0.939
G809	111.75	37.27	G1	P5	0.936
G810	109.43	35.76	G1	P5	0.617
G859	123.31	44.12	G1	P5	0.792
G419	69.13	41.16	Gmixed	Pmixed	0.45
G509	120.17	15.54	G2	Pmixed	0.383
G551	34.46	32.04	G1	Pmixed	0.398
G623	69.1	34.31	Gmixed	Pmixed	0.422
G803	113.92	34.23	G1	Pmixed	0.495
G826	115.81	29.38	G1	Pmixed	0.488
G837	95.26	25.22	Gmixed	Pmixed	0.365
G865	34.4	-23.11	G1	Pmixed	0.414
G870	76.2	19.12	G1	Pmixed	0.462
k1700	-5.88	12.18	G2	Pmixed	0.488
k1716	-15.15	15.6	G2	Pmixed	0.522
